# Supplementary material for: MXene as a non-metal charge mediator in 2D layered CdS@Ti3C2@TiO2 composites with superior Z-scheme visible light-driven photocatalytic activity
Source: Royal Society of Chemistry journal article supplement (doi:10.1039/c9en00567f), 2019-01-01
Supplement: c9en00567f1.pdf [file c9en00567f1.pdf]

# MXene as non-metal charge mediator in 2D layered CdS@Ti<sub>3</sub>C<sub>2</sub>@TiO<sub>2</sub> composites with superior Z-scheme visible light-driven photocatalytic activity

Qiaoran Liu<sup>a</sup>, Xiaoyao Tan<sup>b</sup>, Shaobin Wang<sup>a</sup>, Fang Ma<sup>c</sup>, Hussin Znad<sup>a</sup>, Zhangfeng Shen<sup>d\*</sup>, Lihong Liu<sup>a\*</sup>, Shaomin Liu<sup>a\*</sup>

<sup>a</sup>WA School of Mines: Minerals, Energy and Chemical Engineering, Curtin University, Australia

<sup>b</sup>School of Environmental and Chemical Engineering, Tianjin Polytechnic University, China

<sup>c</sup>State Key Laboratory of Urban Water Resources and Environment, School of Municipal and Environmental Engineering, Harbin Institute of Technology, China

<sup>d</sup>College of Biological, Chemical Science and Engineering, Jiaxing University, China

\*Email: [zfshen@mail.zjxu.edu.cn](mailto:zfshen@mail.zjxu.edu.cn); [Lihong.Liu@curtin.edu.au](mailto:Lihong.Liu@curtin.edu.au); [Shaomin.Liu@curtin.edu.au](mailto:Shaomin.Liu@curtin.edu.au)

\*Telephone: 61-8-92669056

## Supporting Information

**Table S1.** Elemental analysis (weight percentage) of as-prepared samples.

| Samples                             | Ti (at.%) | C (at.%) | O (at.%) | S (at.%) | Cd (at.%) |
|-------------------------------------|-----------|----------|----------|----------|-----------|
| Ti <sub>3</sub> C <sub>2</sub>      | 83.78     | 13.54    | 2.68     | -        | -         |
| Ti <sub>3</sub> C <sub>2</sub> @TiO | 74.63     | 8.41     | 16.96    | -        | -         |
| 2                                   |           |          |          |          |           |
| 1:1CTT                              | 62.54     | 7.23     | 13.22    | 3.81     | 13.20     |
| 2:1CTT                              | 50.06     | 5.69     | 10.81    | 7.35     | 26.09     |
| 3:1CTT                              | 37.52     | 4.03     | 8.12     | 11.39    | 38.94     |
| 4:1CTT                              | 24.19     | 2.45     | 5.21     | 15.37    | 52.78     |

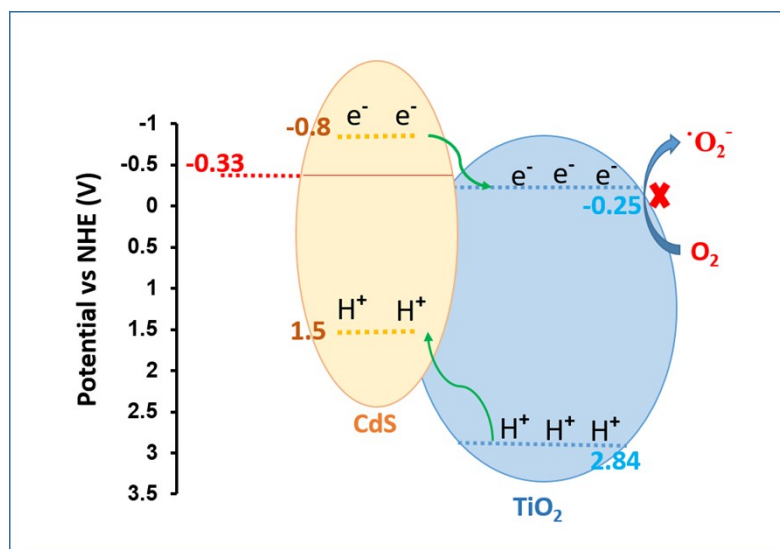

Fig. S1 The photocatalytic mechanism of conventional Type-II CdS@TiO<sub>2</sub> heterojunction.
